# Supplementary material
Source: HighWire-hosted journal article supplement (https://qdcxjkg.com/highwire/filestream/113109/field_highwire_adjunct_files/1/Copy_of_CME_34-5.pdf)
Supplement: Copy_of_CME_34-5.pdf [file Copy_of_CME_34-5.pdf]

# CME Credit Application Form

## (1 CME credit)

To receive CME credits, read the CME article in this issue, indicate the correct responses to the educational questions below and complete the requested information overleaf in full. This form is also available in electronic format at [www.erj.ersjournals.com/current.dtl](http://www.erj.ersjournals.com/current.dtl). To return your application, you can either:

➤ use this form and return it completed to ERSJ Ltd, 442 Glossop Road, Sheffield, S10 2PX, UK; fax to +44-114-2665064; or e-mail to [info@ersj.org.uk](mailto:info@ersj.org.uk)

➤ fill in the online form at [www.erj.ersjournals.com/current.dtl](http://www.erj.ersjournals.com/current.dtl)

Certificates will be e-mailed to the address filled in overleaf. Please allow 4 weeks for processing.

There is now a charge for CME credit applications. For £30 you can make six attempts at the educational questions in issues of the *ERJ*. The charge will apply to each application, whether or not the CME credit is awarded. When you have paid, a reference number will be issued. Please enter your reference number in section 2 if you have already paid, or fill in your credit card details in section 3 if you have not paid. Note that your application for CME credits will not be processed until payment is received in full.

### 1. Educational questions. Answer by marking the correct answer.

#### 1. Which of the following statements is true?

- Hydrolysis of penicillin by a penicillinase is the major mechanism responsible for methicillin resistance in methicillin-resistant *Staphylococcus aureus* (MRSA).
- In vancomycin-resistant *S. aureus*, resistance to vancomycin is due to the presence of altered penicillin-binding proteins with reduced affinity for the antibiotic.
- The acquisition of a new penicillin-binding protein (PBP2a) causes methicillin resistance in MRSA.

#### 2. Which of the following typing methods is not currently used for MRSA strains?

- Typing based on sequences of the repeat region of protein A (*spa* type).
- Profiles of bands obtained by pulsed-field gel electrophoresis following digestion of chromosomal DNA.
- Detection of the principal toxins produced by the strains (toxintype).
- Characterisation of the *SCCmec* element by multiple PCR (*SCCmec* typing).

#### 3. Which of the following statements is true?

- MRSA bacteraemias are associated with significantly higher mortality than methicillin-susceptible *S. aureus* (MSSA) bacteraemias.
- MRSA pneumonias are associated with higher mortality than MSSA pneumonias.
- MRSA is more commonly isolated from community-acquired pneumonia than from healthcare-associated pneumonia.
- Decreased susceptibility to vancomycin does not represent a therapeutical problem for MRSA pneumonia.

#### 4. Which of the following statements is not true?

- Community-acquired (CA)-MRSA is usually more susceptible to non- $\beta$ -lactam antibiotics than hospital-acquired MRSA.
- CA-MRSA often carries a phage-encoded leukocidin (Panton-Valentine toxin) that may contribute to infection pathogenesis.
- The most common presentation of CA-MRSA infection in young patients is necrotising pneumonia.
- CA-MRSA is becoming a leading cause of skin and soft tissue infection in the community.

#### 5. Which of the following characteristics is not a risk factor for MRSA carriage/infection?

- Being an MSSA nasal carrier living in the community.
- Being subjected to haemodialysis as an outpatient.
- Being a nursing home resident.
- Working as a veterinarian in a pig farm.

Please turn the page and fill in your details

# CME Credit Application Form (continued)

## 2. Applicant personal details.

Reference No: ..... ERS Membership No. (if known): .....

Date of Birth (DD/MM/YYYY): .....

Family Name: ..... First Name: .....

Mailing Address: .....

Postal Code: ..... City: ..... Country: .....

Telephone: + ..... E-mail: .....

## 3. Payment details.

I agree for payment of £30 (pounds sterling) to be taken from my credit card (MasterCard and Visa only). Details are as follows:

Card Type: MasterCard / Visa (please circle)      Cardholder Name: .....

Cardholder Number: .....

Start date: .....      Expiry date: .....

\*CW2 No: .....      Signature: .....

Cardholder Address: .....  
(if different from above address)

\*CW2 No: this is the number on the back of your card - without this number we are unable to process payments through the system

Unfortunately, we cannot accept payment by American Express. For payment enquiries, please speak to Joanne Abdy at the ERSJ Ltd Accounts Department: tel: +44 114 2672862; e-mail: joanne.abdy@ersj.org.uk

VAT No. 534 1778 39 Registered in England with Company Registration No. 2655805
